# Supplementary material
Source: PubMed Central journal article supplement (PMC2631298)
Supplement: JCI0936587sd.pdf [file JCI0936587sd.pdf]

| genotype 1 consensus | A | P | T | L | W | A | R | M | I | L | M | T | H | F | F | S                | genotype 1 consensus | A | P | T | L | W | A | R | M | I | L | M | T | H | F | F | S |
|----------------------|---|---|---|---|---|---|---|---|---|---|---|---|---|---|---|------------------|----------------------|---|---|---|---|---|---|---|---|---|---|---|---|---|---|---|---|
| bulk sequence        | . | . | . | . | . | V | . | V | . | L | . | . | . | . | . | .                | bulk sequence        | . | . | . | . | . | V | . | . | . | L | . | . | . | . | . |   |
| clone #1             | . | . | . | . | . | V | . | V | . | L | . | . | . | . | . | .                | clone #1             | . | . | . | . | . | V | . | . | . | L | . | . | . | . | . |   |
| clone #2             | . | . | . | . | . | V | . | V | . | L | . | . | . | . | . | .                | clone #2             | . | . | . | . | . | V | . | . | . | L | . | . | . | . | . |   |
| clone #3             | . | . | . | . | . | V | . | V | . | L | A | . | . | . | . | .                | clone #3             | . | . | . | . | . | V | . | . | . | L | . | . | . | . | . |   |
| clone #4             | . | . | . | S | . | V | . | V | . | L | . | . | . | . | . | .                | clone #4             | . | . | . | . | . | V | . | . | . | L | . | . | . | . | . |   |
| clone #5             | . | . | . | . | . | V | . | V | . | L | . | . | . | . | . | .                | clone #5             | . | . | . | . | . | V | . | . | . | L | . | . | . | . | . |   |
| clone #6             | . | . | . | . | . | V | . | V | . | L | . | . | . | . | . | .                | clone #6             | . | . | . | . | . | V | . | . | . | L | . | . | . | . | . |   |
| clone #7             | . | . | . | . | . | V | . | V | . | L | . | . | . | . | . | .                | clone #7             | . | . | . | . | . | V | . | . | . | L | . | . | . | . | . |   |
| clone #8             | . | . | . | . | . | V | . | V | . | L | . | . | . | . | . | .                | clone #8             | . | . | . | . | . | V | . | . | . | L | . | . | . | . | . |   |
| clone #9             | . | . | . | . | . | V | . | V | . | L | . | . | . | . | . | .                | clone #9             | . | . | . | . | . | V | * | T | . | L | . | . | . | . | . |   |
| clone #10            | . | . | . | . | . | V | . | V | . | L | . | . | . | . | . | .                | clone #10            | . | . | . | . | . | V | . | . | . | L | . | . | . | . | . |   |
| clone #11            | . | . | . | . | . | V | . | V | . | L | . | . | . | . | L | .                | clone #11            | . | . | . | . | . | V | . | . | . | L | . | . | . | . | . |   |
| clone #12            | . | . | . | . | . | V | . | V | . | L | . | . | . | . | . | .                | clone #12            | . | . | . | . | . | V | . | . | . | L | . | . | . | . | . |   |
| bulk sequence**      | . | . | . | . | . | V | . | . | . | L | P | . | . | . | . | bulk sequence    | .                    | . | . | . | . | V | . | V | . | L | . | . | . | . | . |   |   |
| clone #1             | . | . | . | . | . | V | . | V | . | L | . | . | . | . | . | .                | clone #1             | . | . | . | . | . | V | . | V | . | L | . | . | . | . | . |   |
| clone #2             | . | . | . | . | . | V | . | V | . | L | P | . | . | . | . | .                | clone #2             | . | . | . | . | . | V | . | V | . | L | . | . | . | . | . |   |
| clone #3             | . | . | . | . | . | V | . | V | . | L | P | . | . | . | . | .                | clone #3             | . | . | . | . | . | V | . | V | . | L | . | . | . | . | . |   |
| clone #4             | . | . | . | . | . | V | . | V | . | L | P | . | . | . | . | .                | clone #4             | . | . | . | . | . | V | . | V | . | L | . | . | . | . | . |   |
| clone #5             | . | . | . | . | . | V | . | V | . | L | P | . | . | . | . | .                | clone #5             | . | . | . | . | . | V | . | V | . | L | . | . | . | . | . |   |
| clone #6             | . | . | . | . | . | V | . | V | . | L | P | . | . | . | . | .                | clone #6             | . | . | . | . | . | V | . | V | . | L | . | . | . | . | . |   |
| clone #7             | . | . | . | . | . | V | . | V | . | L | P | . | . | . | . | .                | clone #7             | . | . | . | . | . | V | . | V | . | L | . | . | . | . | . |   |
| clone #8             | . | . | . | . | . | V | . | V | . | L | P | . | . | . | . | .                | clone #8             | . | . | . | . | . | V | . | V | . | L | . | . | . | . | . |   |
| clone #9             | . | . | . | . | . | V | . | V | . | L | P | . | . | . | . | .                | clone #9             | . | . | . | . | . | V | . | V | . | L | . | . | . | . | . |   |
| clone #10            | . | . | . | . | . | V | . | V | . | L | P | . | . | . | . | .                | clone #10            | . | . | . | . | . | V | . | V | . | L | . | . | . | . | . |   |
| clone #11            | . | . | . | . | . | V | . | V | . | L | P | . | . | . | . | .                | clone #11            | . | . | . | . | . | V | . | V | . | L | . | . | . | . | . |   |
| bulk sequence        | . | . | . | . | . | V | . | . | . | L | P | . | . | . | . | bulk sequence    | .                    | . | . | . | . | V | . | . | . | L | . | . | . | . | . |   |   |
| clone #1             | . | . | . | . | . | V | . | . | . | L | P | . | . | . | . | .                | clone #1             | . | . | . | . | . | V | . | . | . | L | . | . | . | . | . |   |
| clone #2             | . | . | . | . | . | V | . | . | . | L | P | . | . | . | . | .                | clone #2             | . | . | . | S | . | V | . | . | . | L | . | . | . | . | . |   |
| clone #3             | . | . | . | . | . | V | . | . | . | L | P | . | . | . | . | .                | clone #3             | . | . | . | . | . | V | . | . | . | L | . | . | . | . | . |   |
| clone #4             | . | . | . | . | . | V | . | . | . | L | P | . | . | . | . | .                | clone #4             | . | . | . | . | . | V | . | . | . | L | . | . | . | . | . |   |
| clone #5             | . | . | . | . | . | V | . | . | . | L | P | . | . | . | . | .                | clone #5             | . | . | . | . | . | V | . | . | . | L | . | . | . | . | . |   |
| clone #6             | . | . | . | . | . | V | . | . | . | L | P | . | . | . | . | .                | clone #6             | . | . | . | . | . | V | . | . | . | L | . | . | . | . | . |   |
| clone #7             | . | . | . | . | . | V | . | . | . | L | P | . | . | . | . | .                | clone #7             | . | . | . | . | . | V | . | . | . | L | . | . | . | . | . |   |
| clone #8             | . | . | . | . | . | V | . | . | . | L | P | . | . | . | . | .                | clone #8             | . | . | . | . | . | V | . | . | . | L | . | . | . | . | . |   |
| clone #9             | . | . | . | . | . | V | . | . | . | L | P | . | . | . | . | .                | clone #9             | . | . | . | . | . | V | . | . | . | L | . | . | . | . | . |   |
| clone #10            | . | . | . | . | . | V | . | . | . | L | P | . | . | . | . | .                | clone #10            | . | . | . | . | . | V | . | . | . | L | . | . | . | . | . |   |
| clone #11            | . | . | . | . | . | V | . | . | . | L | P | . | . | . | . | .                | clone #11            | . | . | . | . | . | V | . | . | . | L | . | . | . | . | . |   |
| clone #12            | . | . | . | . | . | V | . | . | . | L | P | . | . | . | . | .                | clone #12            | . | . | . | . | . | V | . | . | . | L | . | . | . | . | . |   |
| bulk sequence***     | . | . | . | . | . | V | . | . | . | L | P | . | . | . | . | bulk sequence*** | .                    | . | . | . | . | V | . | . | . | L | . | . | . | . | . |   |   |
| bulk sequence        | . | . | . | . | . | V | . | . | . | L | P | . | . | . | . | bulk sequence    | .                    | . | . | . | . | V | . | . | . | L | . | . | . | . | . |   |   |
| clone #1             | . | . | . | . | . | V | . | . | . | L | P | . | . | . | . | clone #1         | .                    | . | . | . | . | V | . | . | . | L | . | . | . | . | . |   |   |
| clone #2             | . | . | . | . | . | V | . | . | . | L | P | . | . | . | . | clone #2         | .                    | . | . | . | . | V | . | . | . | L | . | . | . | . | . |   |   |
| clone #3             | . | . | . | . | . | V | . | . | . | L | P | . | . | . | . | clone #3         | .                    | . | . | . | . | V | . | . | . | L | . | . | . | . | . |   |   |
| clone #4             | . | . | . | . | . | V | . | . | . | L | P | . | . | . | . | clone #4         | .                    | . | . | . | . | V | . | . | . | L | . | . | . | . | . |   |   |
| clone #5             | . | . | . | . | . | V | . | . | . | L | P | . | . | . | . | clone #5         | .                    | . | . | . | . | V | . | . | . | L | . | . | . | . | . |   |   |
| clone #6             | . | . | . | . | . | V | . | . | . | L | P | . | . | . | . | clone #6         | .                    | . | . | . | . | V | . | . | . | L | . | . | . | . | . |   |   |
| clone #7             | . | . | . | . | . | V | . | . | . | L | P | . | . | . | . | clone #7         | .                    | . | . | . | . | V | . | . | . | L | . | . | . | . | . |   |   |
| clone #8             | . | . | . | . | . | V | . | . | . | L | P | . | . | . | . | clone #8         | .                    | . | . | . | . | V | . | . | . | L | . | . | . | . | . |   |   |
| clone #9             | . | . | . | . | . | V | . | . | . | L | P | . | . | . | . | clone #9         | .                    | . | . | . | . | V | . | . | . | L | . | . | . | . | . |   |   |
| clone #10            | . | . | . | . | . | V | . | . | . | L | P | . | . | . | . | clone #10        | .                    | . | . | . | . | V | . | . | . | L | . | . | . | . | . |   |   |
| clone #11            | . | . | . | . | . | V | . | . | . | L | P | . | . | . | . | clone #11        | .                    | . | . | . | . | V | . | . | . | L | . | . | . | . | . |   |   |
| clone #12            | . | . | . | . | . | V | . | . | . | L | P | . | . | . | . | clone #12        | .                    | . | . | . | . | V | . | . | . | L | . | . | . | . | . |   |   |
| bulk sequence        | . | . | . | . | . | V | . | . | . | L | P | . | . | . | . | bulk sequence    | .                    | . | . | . | . | V | . | . | . | L | . | . | . | . | . |   |   |
| clone #1             | . | . | . | . | . | V | . | . | . | L | P | . | . | . | . | clone #1         | .                    | . | . | . | . | V | . | . | . | L | . | . | . | . | . |   |   |
| clone #2             | . | . | . | . | . | V | . | . | . | L | P | . | . | . | . | clone #2         | .                    | . | . | . | . | V | . | . | . | L | . | . | . | . | . |   |   |
| clone #3             | . | . | . | . | . | V | . | . | . | L | P | . | . | . | . | clone #3         | .                    | . | . | . | . | V | . | . | . | L | . | . | . | . | . |   |   |
| clone #4             | . | . | . | . | . | V | . | . | . | L | P | . | . | . | . | clone #4         | .                    | . | . | . | . | V | . | . | . | L | . | . | . | . | . |   |   |
| clone #5             | . | . | . | . | . | V | . | . | . | L | P | . | . | . | . | clone #5         | .                    | . | . | . | . | V | . | . | . | L | . | . | . | . | . |   |   |
| clone #6             | . | . | . | . | . | V | . | . | . | L | P | . | . | . | . | clone #6         | .                    | . | . | . | . | V | . | . | . | L | . | . | . | . | . |   |   |
| clone #7             | . | . | . | . | . | V | . | . | . | L | P | . | . | . | . | clone #7         | .                    | . | . | . | . | V | . | . | . | L | . | . | . | . | . |   |   |
| clone #8             | . | . | . | . | . | V | . | . | . | L | P | . | . | . | . | clone #8         | .                    | . | . | . | . | V | . | . | . | L | . | . | . | . | . |   |   |
| clone #9             | . | . | . | . | . | V | . | . | . | L | P | . | . | . | . | clone #9         | .                    | . | . | . | . | V | . | . | . | L | . | . | . | . | . |   |   |
| clone #10            | . | . | . | . | . | V | . | . | . | L | P | . | . | . | . | clone #10        | .                    | . | . | . | . | V | . | . | . | L | . | . | . | . | . |   |   |
| clone #11            | . | . | . | . | . | V | . | . | . | L | P | . | . | . | . | clone #11        | .                    | . | . | . | . | V | . | . | . | L | . | . | . | . | . |   |   |
| clone #12            | . | . | . | . | . | V | . | . | . | L | P | . | . | . | . | clone #12        | .                    | . | . | . | . | V | . | . | . | L | . | . | . | . | . |   |   |
| bulk sequence        | . | . | . | . | . | V | . | . | . | L | P | . | . | . | . | bulk sequence    | .                    | . | . | . | . | V | . | . | . | L | . | . | . | . | . |   |   |
| clone #1             | . | . | . | . | . | V | . | . | . | L | P | . | . | . | . | clone #1         | .                    | . | . | . | . | V | . | . | . | L | . | . | . | . | . |   |   |
| clone #2             | . | . | . | . | . | V | . | . | . | L | P | . | . | . | . | clone #2         | .                    | . | . | . | . | V | . | . | . | L | . | . | . | . | . |   |   |
| clone #3             | . | . | . | . | . | V | . | . | . | L | P | . | . | . | . | clone #3         | .                    | . | . | . | . | V | . | . | . | L | . | . | . | . | . |   |   |
| clone #4             | . | . | . | . | . | V | . | . | . | L | P | . | . | . | . | clone #4         | .                    | . | . | . | . | V | . | . | . | L | . | . | . | . | . |   |   |
| clone #5             | . | . | . | . | . | V | . | . | . | L | P | . | . | . | . | clone #5         | .                    | . | . | . | . | V | . | . | . | L | . | . | . | . | . |   |   |
| clone #6             | . | . | . | . | . | V | . | . | . | L | P | . | . | . | . | clone #6         | .                    | . | . | . | . | V | . | . | . | L | . | . | . | . | . |   |   |
| clone #7             | . | . | . | . | . | V | . | . | . | L | P | . | . | . | . | clone #7         | .                    | . | . | . | . | V | . | . | . | L | . | . | . | . | . |   |   |
| clone #8             | . | . | . | . | . | V | . | . | . | L | P | . | . | . | . | clone #8         | .                    | . | . | . | . | V | . | . | . | L | . | . | . | . | . |   |   |
| clone #9             | . | . | . | . | . | V | . | . | . | L | P | . | . | . | . | clone #9         | .                    | . | . | . | . | V | . | . | . | L | . | . | . | . | . |   |   |
| clone #10            | . | . | . | . | . | V | . | . | . | L | P | . | . | . | . | clone #10        | .                    | . | . | . | . | V | . | . | . | L | . | . | . | . | . |   |   |
| clone #11            | . | . | . | . | . | V | . | . | . | L | P | . | . | . | . | clone #11        | .                    | . | . | . | . | V | . | . | . | L | . | . | . | . | . |   |   |
| clone #12            | . | . | . | . | . | V | . | . | . | L | P | . | . | . | . | clone #12        | .                    | . | . | . | . | V | . | . | . | L | . | . | . | . | . |   |   |

\* stop codon

? single nucleotide deletion

\*\* serum for the clonal sequence data was obtained two years later than serum obtained for bulk sequences

\*\*\* clonal sequence data not available

## Supplementary Fig. S1
